# Supplementary material for: Novel 2-naphthyl substituted zinc naphthalocyanine: synthesis, optical, electrochemical and spectroelectrochemical properties
Source: Royal Society of Chemistry journal article supplement (doi:10.1039/d0nj00987c), 2020-01-01
Supplement: d0nj00987c1.pdf [file d0nj00987c1.pdf]

**Supporting Information**

**Novel 2-naphthyl substituted zinc naphthalocyanine: synthesis, optical,  
electrochemical and spectroelectrochemical properties**

Tatiana V. Dubinina<sup>a,b@</sup>, Ekaterina O. Moiseeva<sup>a</sup>, Dmitry A. Astvatsaturov<sup>a</sup>, Nataliya E.  
Borisova<sup>a,c</sup>, Pavel A. Tarakanov<sup>b</sup>, Stanislav A. Trashin<sup>d,e</sup>, Karolien De Wael<sup>d,e</sup>, Larisa G. Tomilova<sup>a,b</sup>

a. *Department of chemistry, Lomonosov Moscow State University, 119991 Moscow, Russian Federation.*

b. *Institute of physiologically Active Compounds, Russian Academy of Science, 142432 Chernogolovka, Moscow Region, Russian Federation.*

c. *A.N. Nesmeyanov Institute of Organoelement Compounds Russian Academy of Science, 28 Vavilov Str. 119334 Moscow, Russian Federation*

d. *AXES research group, Groenenborgerlaan 171, University of Antwerp, 2020 Antwerp, Belgium.*

@Corresponding author E-mail: [dubinina.t.vid@gmail.com](mailto:dubinina.t.vid@gmail.com)

e. *Nanolab Center of Excellence, Groenenborgerlaan 171, University of Antwerp, 2020 Antwerp, Belgium.*

**Figure S1.**  $^1\text{H}$ - $^{13}\text{C}$  HSQC spectrum of dinitrile **2** in DMSO- $\text{d}_6$ : aromatic region (top), expanded fragment of aromatic region (bottom).

**Figure S2.**  $^1\text{H}$ - $^{13}\text{C}$  HMBC spectrum of dinitrile **2** in DMSO- $\text{d}_6$ : aromatic region (top), expanded fragment of aromatic region (bottom).

**Figure S3.** EI mass spectrum of compound **2**.

**Figure S4.** MALDI-TOF mass spectrum of complex **3**, isotopic pattern for the molecular ion (inset A) and simulated MS pattern of the molecular ion (inset B).

**Figure S5.** FT-IR spectra of zinc complex **3** in ZnSe (A) and compound **2** in KBr (B).

**Figure S6.** Thermogram (TG), derivative thermogravimetric curve (DTG) and differential scanning calorimetry (DSC) (A); results of evolved gas analysis by mass-spectrometry (B-G) for complex **3**.

**Figure S7.** UV-Vis spectra of the solution of **3** in *o*-DCB after addition of 1 vol % pyridine at various concentrations (green line -  $c=1.1\times 10^{-4}$ , blue line –  $c=6.9\times 10^{-6}$ , dashed lines – intermediate concentrations) (A). The molar extinction coefficient vs concentration plot (B).

**Figure S8.** UV-Vis (solid lines) and fluorescence (dash lines,  $\lambda_{\text{ex}} = 695 \text{ nm}$ ), spectra of solution of compound **3** diluted from  $c=2.0\times 10^{-5} \text{ M}$  to  $c=1.25\times 10^{-6} \text{ M}$  in *o*-DCB after the addition of 1 vol% pyridine (A). Fluorescence quantum yield at various concentrations for the solution of compound **3** in *o*-DCB after the addition of 1 vol% pyridine (B).

**Figure S9.** UV-Vis (solid lines) and fluorescence (dash lines,  $\lambda_{\text{ex}} = 695 \text{ nm}$ ), spectra of solution of compound **3** diluted from  $c=2.0\times 10^{-5} \text{ M}$  to  $c=0.625\times 10^{-6} \text{ M}$  in *o*-DCB after addition of 0.12 M of  $\text{NBu}_4\text{F}$  (A). Fluorescence quantum yield at various concentrations for the solution of compound **3** in *o*-DCB after addition of 0.12 M of  $\text{NBu}_4\text{F}$ ,  $\lambda_{\text{ex}} = 695 \text{ nm}$  (B).

**Figure S10.** EPR spectra of freshly prepared solution of compound **3** in *o*-DCB ( $c=3\times 10^{-5} \text{ M}$ ) (black line) and solution after 7 days storage (blue line).

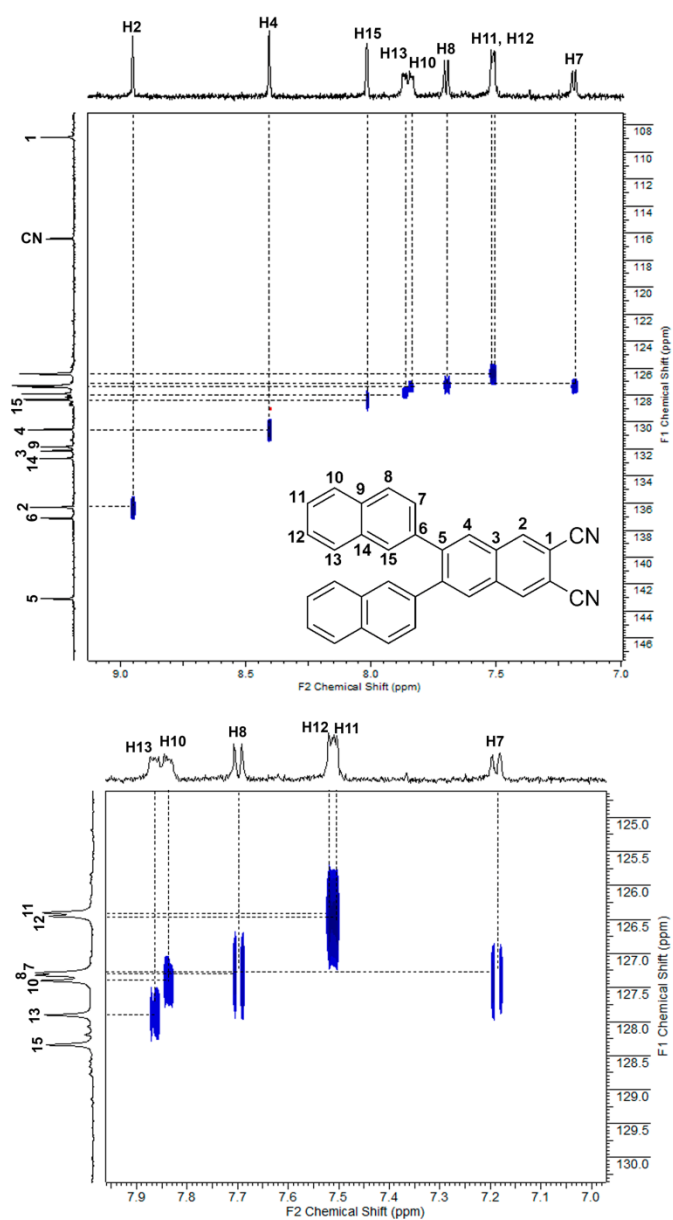

**Figure S1.**  $^1\text{H}$ - $^{13}\text{C}$  HSQC spectrum of dinitrile **2** in  $\text{DMSO-d}_6$ : aromatic region (top), expanded fragment of aromatic region (bottom).

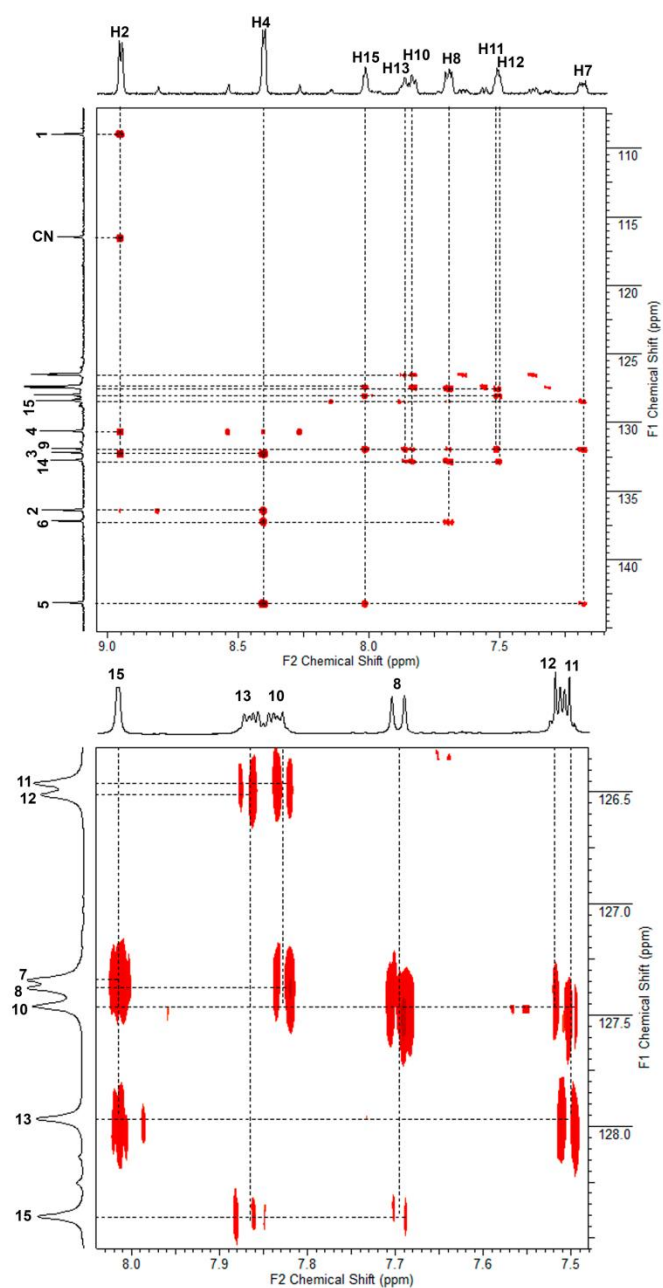

**Figure S2.**  $^1\text{H}$ - $^{13}\text{C}$  HMBC spectrum of dinitrile **2** in  $\text{DMSO-d}_6$ : aromatic region (top), expanded fragment of aromatic region (bottom).

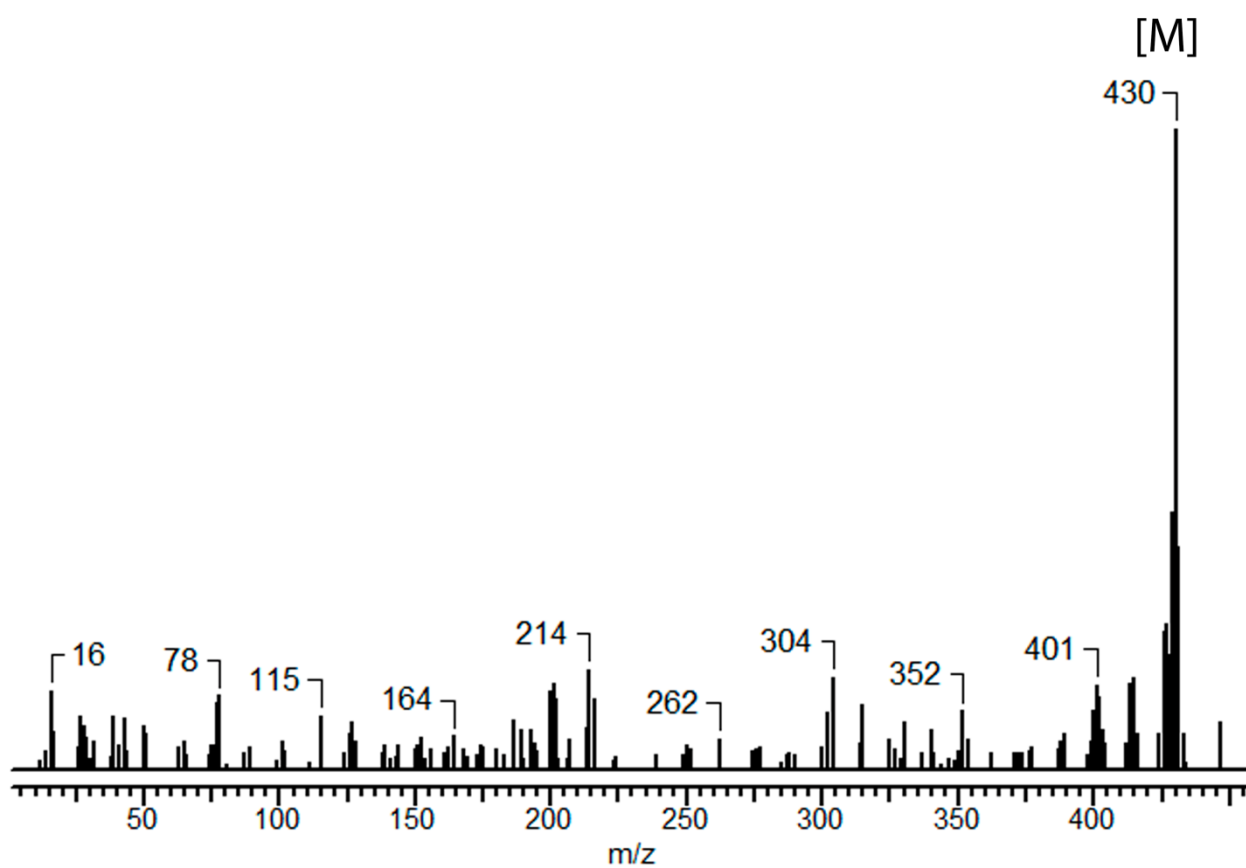

**Figure S3.** EI mass spectrum of compound **2**.

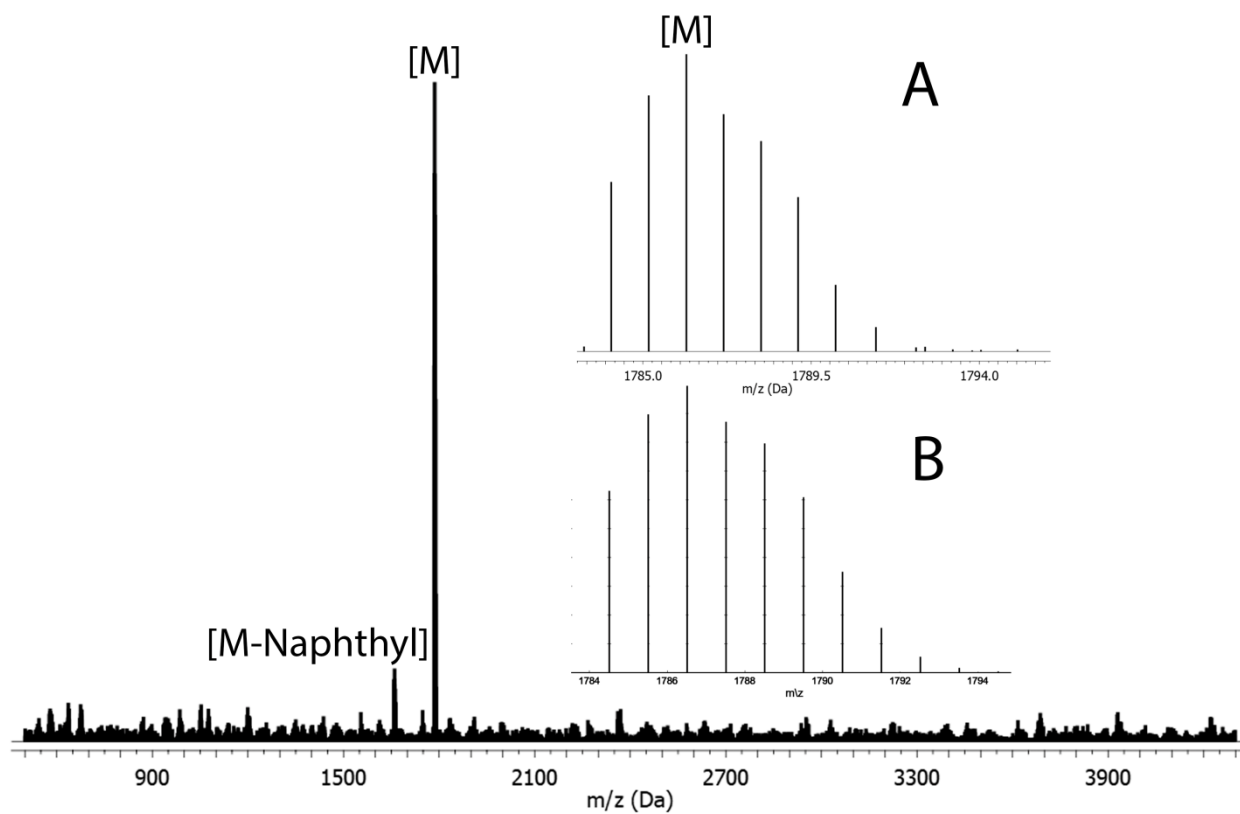

**Figure S4.** MALDI-TOF mass spectrum of complex **3**, isotopic pattern for the molecular ion (inset A) and simulated MS pattern of the molecular ion (inset B).

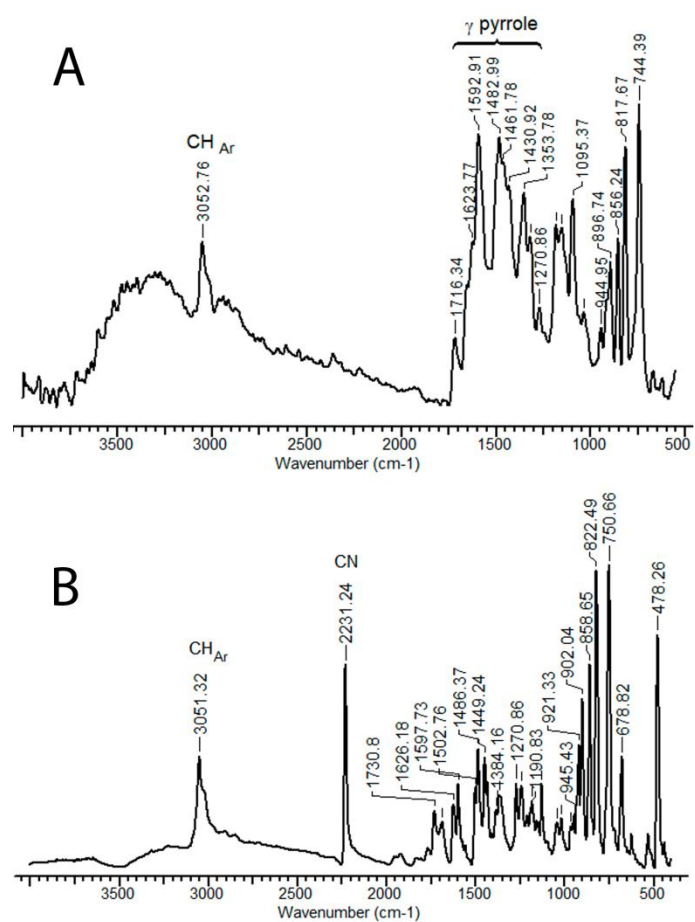

**Figure S5.** FT-IR spectra of zinc complex **3** in ZnSe (A) and compound **2** in KBr (B).

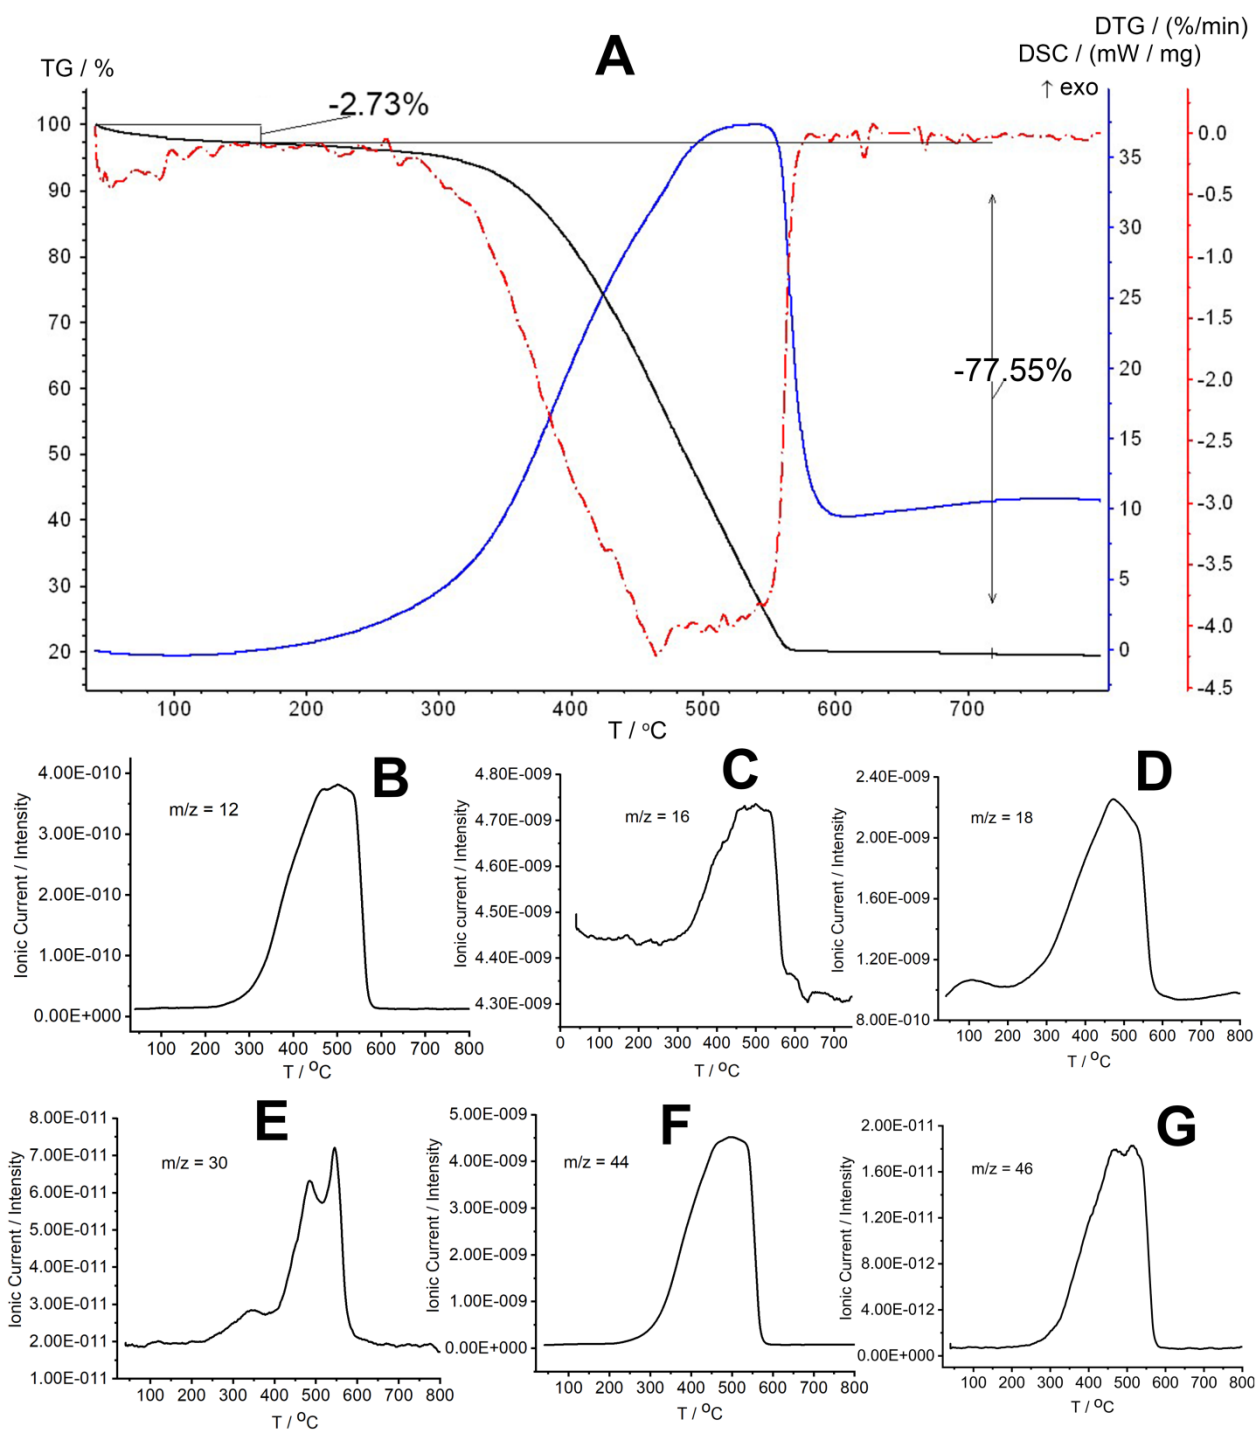

**Figure S6.** Thermogram (TG), derivative thermogravimetric curve (DTG) and differential scanning calorimetry (DSC) (A); results of evolved gas analysis by mass-spectrometry (B-G) for complex **3**.



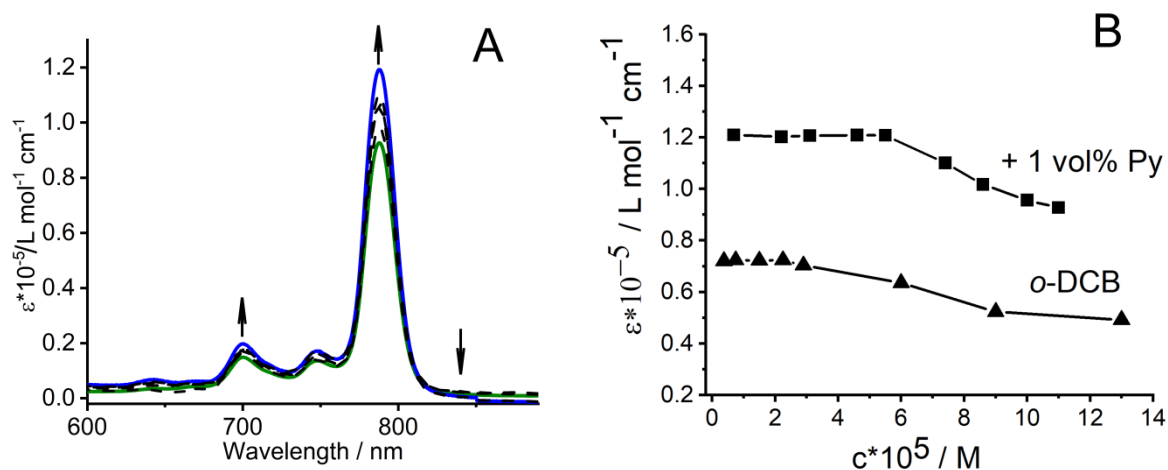

**Figure S7.** UV-Vis spectra of the solution of **3** in *o*-DCB after addition of 1 vol % pyridine at various concentrations (green line -  $c = 1.1 \times 10^{-4}$ , blue line -  $c = 6.9 \times 10^{-6}$ , dashed lines - intermediate concentrations) (A). The molar extinction coefficient of Q band vs concentration plot (B).

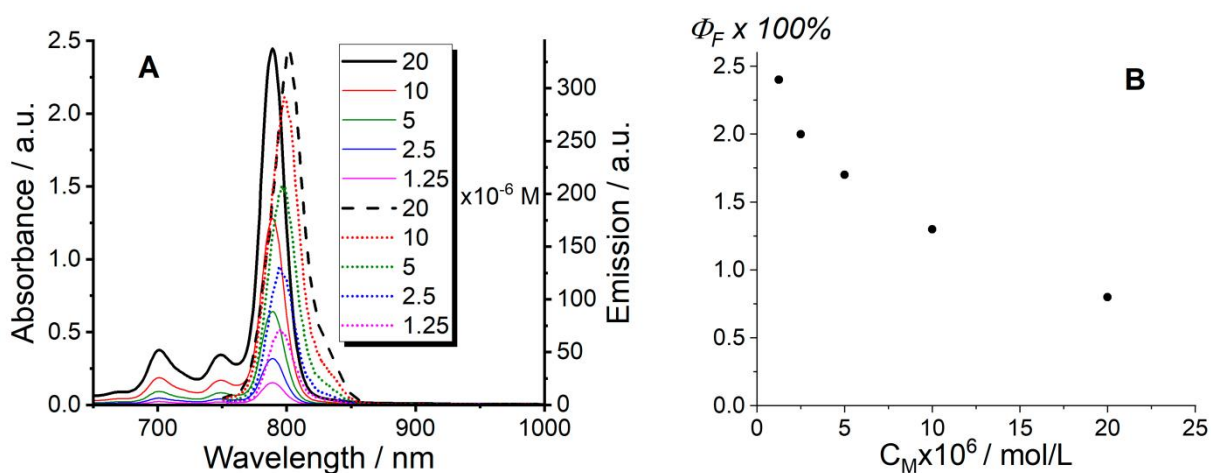

**Figure S8.** UV-Vis (solid lines) and fluorescence (dash lines,  $\lambda_{\text{ex}} = 695$  nm), spectra of solution of compound **3** diluted from  $c = 2.0 \times 10^{-5}$  M to  $c = 1.25 \times 10^{-6}$  M in *o*-DCB after the addition of 1 vol% pyridine (A). Fluorescence quantum yield at various concentrations for the solution of compound **3** in *o*-DCB after the addition of 1 vol% pyridine (B).

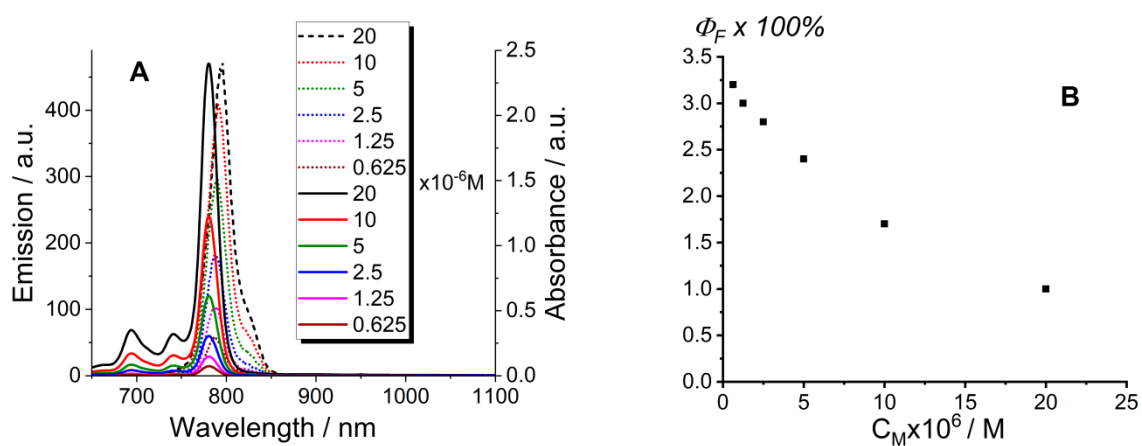

**Figure S9.** UV-Vis (solid lines) and fluorescence (dash lines,  $\lambda_{\text{ex}} = 695 \text{ nm}$ ), spectra of solution of compound **3** diluted from  $c=2.0 \times 10^{-5} \text{ M}$  to  $c=0.625 \times 10^{-6} \text{ M}$  in *o*-DCB after addition of 0.12 M of NBu<sub>4</sub>F (A). Fluorescence quantum yield at various concentrations for the solution of compound **3** in *o*-DCB after addition of 0.12 M of NBu<sub>4</sub>F,  $\lambda_{\text{ex}} = 695 \text{ nm}$  (B).

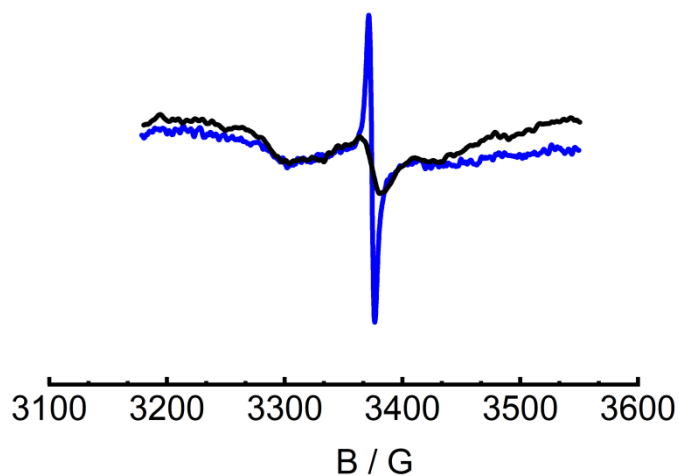

**Figure S10.** EPR spectra of freshly prepared solution of compound **3** in *o*-DCB ( $c=3 \times 10^{-5} \text{ M}$ ) (black line) and solution after 7 days storage (blue line).
